# Supplementary material for: Type 1 diabetes prevalence increasing globally and regionally: the role of natural selection and life expectancy at birth
Source: PubMed Central journal article supplement — BMJ Open Diabetes Res Care. 2016 Mar 2;4(1):e000161. doi: 10.1136/bmjdrc-2015-000161 (PMC4780042; doi:10.1136/bmjdrc-2015-000161), 2016-03-02
Supplement: bmjdrc-2015-000161supp_tableS1.pdf [file bmjdrc-2015-000161supp_tableS1.pdf]

Table S1: lbs values of 118 countries

| Country           | lbs   | Country              | lbs   | Country       | lbs   |
|-------------------|-------|----------------------|-------|---------------|-------|
| Iceland           | 0.994 | Ukraine              | 0.977 | Pakistan      | 0.877 |
| Cyprus            | 0.994 | Mauritius            | 0.977 | Kenya         | 0.872 |
| Singapore         | 0.994 | Argentina            | 0.976 | Haiti         | 0.871 |
| Japan             | 0.993 | Mexico               | 0.976 | Senegal       | 0.870 |
| Switzerland       | 0.993 | Syrian Arab Republic | 0.976 | Togo          | 0.854 |
| Sweden            | 0.992 | Albania              | 0.975 | Gambia        | 0.849 |
| Luxembourg        | 0.992 | Brazil               | 0.975 | Tanzania      | 0.830 |
| Germany           | 0.992 | Turkey               | 0.975 | Sudan         | 0.821 |
| Italy             | 0.992 | Bahamas              | 0.974 | Uganda        | 0.817 |
| Czech Republic    | 0.992 | Venezuela            | 0.974 | Ethiopia      | 0.815 |
| Spain             | 0.992 | Colombia             | 0.974 | South Africa  | 0.811 |
| France            | 0.992 | Tunisia              | 0.972 | Congo         | 0.810 |
| Denmark           | 0.991 | Thailand             | 0.971 | Zimbabwe      | 0.809 |
| Norway            | 0.991 | Egypt                | 0.971 | Côte d'Ivoire | 0.783 |
| Netherlands       | 0.991 | Belize               | 0.969 | Nigeria       | 0.782 |
| Israel            | 0.991 | El Salvador          | 0.969 | Mali          | 0.774 |
| Greece            | 0.991 | China                | 0.969 | Zambia        | 0.761 |
| Austria           | 0.991 | Sri Lanka            | 0.969 | Cameroon      | 0.760 |
| Finland           | 0.991 | Peru                 | 0.967 | Mozambique    | 0.752 |
| Portugal          | 0.991 | Fiji                 | 0.967 | Congo, DR     | 0.729 |
| Belgium           | 0.990 | Panama               | 0.967 |               |       |
| Malta             | 0.990 | Paraguay             | 0.967 |               |       |
| Ireland           | 0.990 | Libya                | 0.966 |               |       |
| Australia         | 0.990 | Saudi Arabia         | 0.966 |               |       |
| United Kingdom    | 0.990 | Iran                 | 0.963 |               |       |
| Slovenia          | 0.990 | Georgia              | 0.963 |               |       |
| Estonia           | 0.989 | Ecuador              | 0.962 |               |       |
| Canada            | 0.989 | Jordan               | 0.961 |               |       |
| Hungary           | 0.989 | Suriname             | 0.956 |               |       |
| Slovakia          | 0.989 | Dominican Republic   | 0.956 |               |       |
| Croatia           | 0.989 | Jamaica              | 0.956 |               |       |
| Cuba              | 0.989 | Trinidad and Tobago  | 0.956 |               |       |
| Poland            | 0.989 | Honduras             | 0.955 |               |       |
| Republic of Korea | 0.988 | Morocco              | 0.955 |               |       |
| Lithuania         | 0.988 | Kazakhstan           | 0.955 |               |       |
| New Zealand       | 0.988 | Philippines          | 0.953 |               |       |
| TFYR Macedonia    | 0.986 | Tonga                | 0.953 |               |       |
| Chile             | 0.986 | Kyrgyzstan           | 0.951 |               |       |
| USA               | 0.985 | Guyana               | 0.949 |               |       |
| Qatar             | 0.985 | Indonesia            | 0.945 |               |       |
| Malaysia          | 0.985 | Guatemala            | 0.939 |               |       |
| Costa Rica        | 0.984 | Iraq                 | 0.936 |               |       |
| Bulgaria          | 0.984 | Bolivia              | 0.931 |               |       |
| Romania           | 0.983 | Bangladesh           | 0.921 |               |       |
| Barbados          | 0.981 | Madagascar           | 0.912 |               |       |
| Bahrain           | 0.981 | India                | 0.898 |               |       |
| Kuwait            | 0.980 | Papua New Guinea     | 0.892 |               |       |
| Uruguay           | 0.980 | Gabon                | 0.890 |               |       |
| Lebanon           | 0.980 | Ghana                | 0.885 |               |       |
