# Supplementary material for: Type 1 diabetes prevalence increasing globally and regionally: the role of natural selection and life expectancy at birth
Source: PubMed Central journal article supplement — BMJ Open Diabetes Res Care. 2016 Mar 2;4(1):e000161. doi: 10.1136/bmjdrc-2015-000161 (PMC4780042; doi:10.1136/bmjdrc-2015-000161), 2016-03-02
Supplement: bmjdrc-2015-000161supp_tableS2.pdf [file bmjdrc-2015-000161supp_tableS2.pdf]

**Table S2: Descriptive Statistics**

|                                                    | N         | Range     | Minimum   | Maximum   | Mean      | Std. Deviation | Skewness  |
|----------------------------------------------------|-----------|-----------|-----------|-----------|-----------|----------------|-----------|
|                                                    | Statistic | Statistic | Statistic | Statistic | Statistic | Statistic      | Statistic |
| T1DM (Total) Prevalence (‰), IDF, 2000             | 118       | 8.58      | 0.03      | 8.60      | 1.17      | 1.20           | 2.77      |
| lbs self calculated                                | 118       | 0.27      | 0.73      | 0.99      | 0.94      | 0.07           | -1.70     |
| Life expectancy increase (e50, 1950-2010)          | 116       | 12.14     | -0.57     | 11.57     | 5.87      | 2.46           | -0.15     |
| Life expectancy (e50, 2005-10), UN                 | 118       | 14.32     | 20.04     | 34.36     | 27.81     | 3.45           | -0.19     |
| Life Expectancy at birth (years), WHO, 2010        | 118       | 32.00     | 52.00     | 84.00     | 73.23     | 7.96           | -0.89     |
| BMI≥ 30 prevalence 18+ (%), WHO, 2010              | 118       | 38.70     | 2.90      | 41.60     | 18.34     | 8.80           | -0.11     |
| GDP,PPP, the World Bank 2010                       | 116       | 124775.41 | 619.47    | 125394.88 | 19773.82  | 19555.61       | 2.15      |
| Sugar availability (g/capita/day), FAO, 2010       | 118       | 167.62    | 0.00      | 167.62    | 86.99     | 46.40          | -0.23     |
| Urban population (% of total) the World Bank, 2010 | 118       | 90.91     | 9.09      | 100.00    | 62.19     | 21.93          | -0.37     |
| Valid N (listwise)                                 | 114       |           |           |           |           |                |           |
